# Evidence against the detectability of a hippocampal place code using functional magnetic resonance imaging

Christopher R. Nolan<sup>1</sup>, J.M.G. Vromen<sup>1,2</sup>, Allen Cheung<sup>1</sup>, Oliver Baumann<sup>1\*</sup>

<sup>1</sup>The University of Queensland, Queensland Brain Institute, Brisbane, Queensland, Australia; <sup>2</sup>University of Oxford, Nuffield Department of Clinical Neurosciences, Oxford, UK

\*Email: [o.baumann@uq.edu.au](mailto:o.baumann@uq.edu.au)

**Abstract** Individual hippocampal neurons selectively increase their firing rates in specific spatial locations. As a population these neurons provide a decodable representation of space that is robust against changes to sensory- and path-related cues. This neural code is sparse and distributed, theoretically rendering it undetectable with population recording methods such as functional magnetic resonance imaging (fMRI). Existing studies nonetheless report decoding spatial codes in the human hippocampus using such techniques. Here we present results from a virtual navigation experiment in humans in which we eliminated visual- and path-related confounds and statistical shortcomings present in existing studies, ensuring that any positive decoding results would be only spatial in nature and would represent a true voxel-place code. Consistent with theoretical arguments derived from electrophysiological data and contrary to existing fMRI studies, our results show that although participants were fully oriented during the navigation task, there was no statistical evidence for a place code.

## Introduction

Acquisition of declarative memories is dependent on the hippocampus. Place cells — hippocampal principal cells that exhibit allocentric spatial tuning — provide a clear behavioural correlate with which to interrogate the neuronal dynamics of this region (O'Keefe and Dostrovsky, 1971). Initially discovered in rodents, the existence of place cells has since been confirmed in other species, including humans (Ekstrom et al., 2003). The activity across populations of such cells, as measured with single cell recordings, can be decoded to provide an accurate estimate of an animal's current position (Brown et al., 1998), and the activity appears to reflect a cognitive map, resilient against changes in any particular internal or external cue. However, the sparse firing and random distribution of spatial tuning amongst the place cell population suggests that any such place code should be impenetrable to current mass imaging technology such as fMRI.

A true place code should be demonstrably selective for position in a mnemonic representation of space rather than particular external or non-mnemonic internal cues such as unique visual patterns or egocentric movement. We are aware of four studies that claim to provide evidence for a voxel place code (Hassabis et al., 2009; Kim et al., 2017; Rodriguez, 2010; Sulpizio et al., 2014). Each experiment involved distinguishing between fMRI scans taken at two or more locations in a virtual arena. All four experiments failed to remove significant visual confounds, either in the form of salient visual landmarks during navigation to a target (Hassabis et al., 2009; Kim et al., 2017; Rodriguez, 2010) or at the target (Rodriguez, 2010; Sulpizio et al., 2014), or as visual panoramas unique to each target location (Kim et al., 2017). We later discuss how these confounds, amongst others, are manifest in each experiment (see Discussion), but note here that any legitimate voxel codes in these experiments could be sensory-driven rather than true place codes.

Beyond experimental design issues, detecting a voxel place code necessitates distinguishing between complex multivariate voxel patterns. Each of the existing four studies uses multivariate pattern analysis (MVPA) techniques to classify voxel patterns as characteristic of particular virtual locations. While these analytics are valid in principle, subsequent statistical inferences cannot necessarily rely on classical assumptions. For example, the practice of submitting within-subject classification results to a second-level t-test to infer group statistics — a technique used by two of the referenced hippocampal studies — has been demon-

35 strated as invalid on information-like measures such as classification results (Allefeld et al., 2016). In particular, the true value of information-like measures cannot be below chance, thereby restricting the null hypothesis to be the total absence of information. Hence even when the null is rejected, the strongest conclusion possible is that there are people in whom information is found, not that the information is prevalent or generalizable (Allefeld et al., 2016). Additionally, such measures violate assumptions of Gaussian or other symmetric null distributions (Stelzer et al., 2013; Brodersen et al., 2013). We found that in three of the existing studies (Hassabis et al., 2009; Rodriguez, 2010; Sulpizio et al., 2014), statistical issues marred the interpretation of any evidence (see Methods and Results).

43 These concerns motivated us to revisit the question of whether a voxel place code is truly detectable with human fMRI. We had a group of healthy participants perform a virtual navigation task, while undergoing high-resolution 3T fMRI. The environment was a circular arena containing two unmarked target locations (see Figure 1a). On each trial, participants were initially shown an orienting landmark and then had to track their position while being passively moved along a curvilinear path to one of the two target locations. During navigation, the participants had to rely solely on their mental representation of the environment and track their position using visual self-motion cues. After arriving at one of the target locations, we probed the participants' positional knowledge. We then used linear and non-linear multivoxel classification methods to test whether we could distinguish hippocampal fMRI signals corresponding to periods at which participants were present at each of the two target locations.

## 53 **Materials and methods**

### 54 **Participants**

55 Twenty-one healthy, adult volunteers gave their informed consent to participate in the study, which was approved by the Human Research Ethics Committee of The University of Queensland. The first two participants were only used for pilot testing, to optimise acquisition parameters. One participant was omitted from the data analysis because the behavioural performance was below our a priori criterion of 90% correct responses. The remaining 18 participants (9 females) ranged in age from 18 to 29 years (mean, 21 years) and all were right-handed. Classical sample-size estimation techniques are not applicable to the classification analyses in the present study, however we deemed our sample size sufficient given that three of the four existing studies reported a positive place code effect with fewer subjects (Hassabis et al., 2009; Rodriguez, 2010; Sulpizio et al., 2014).

### 64 **Stimuli and procedure**

65 The virtual environment was a circular arena surrounded by a brick wall, with a grass-textured floor and featureless blue sky. The arena wall was 3.0 m high and its diameter was 30.4 m, relative to a 1.7 m observer. Along the wall, four landmarks (white 1.0 m  $\times$  1.0 m squares with black symbols: '+', '%', '?', and '#') were located equidistantly (45°, 135°, 225° and 315°). The two beacons (yellow and blue, see Figure 1a) were 3 m tall and 0.5 m in diameter, located at 0° and 180°, and 5 m from the centre of the arena (i.e. 10 m apart from each other).

71 The task required participants to track their location, while being passively moved (4.2 m/s linear speed) in the absence of orienting landmarks through the environment, therefore relying only on a combination of visual self-motion cues and their mental representation of the landmarks' locations (see Figure 1b for details of the task sequence). At the beginning of each trial, participants closely faced one of the four peripheral landmarks on the arena wall for one second. Subsequently, all four landmarks were made invisible (i.e. replaced by white placeholders) and participants were turned around and moved for 6 s along a curvilinear path to one of the two unmarked target locations. Participants were led to the target location via 24 different curvilinear paths of equal length (see Figure 1c), so that participants could not infer the target location simply based on the initial landmark cue and the length of the path. After arriving at the target location, participants were prompted to indicate their location within 3.5 s, via a yes/no button response to either the question "Yellow?" or the question "Blue?", chosen at random. This procedure ensured that the button response was orthogonal to the target location. The response period was followed by a 10.5 s rest period, in which only a white fixation cross on a black screen was shown (see Figure 1b). There were in total 120 trials (60 per target location) split up into five imaging runs, lasting ~8.5 minutes each.

85 We used the Blender open-source three-dimensional content creation suite (The Blender Foundation)

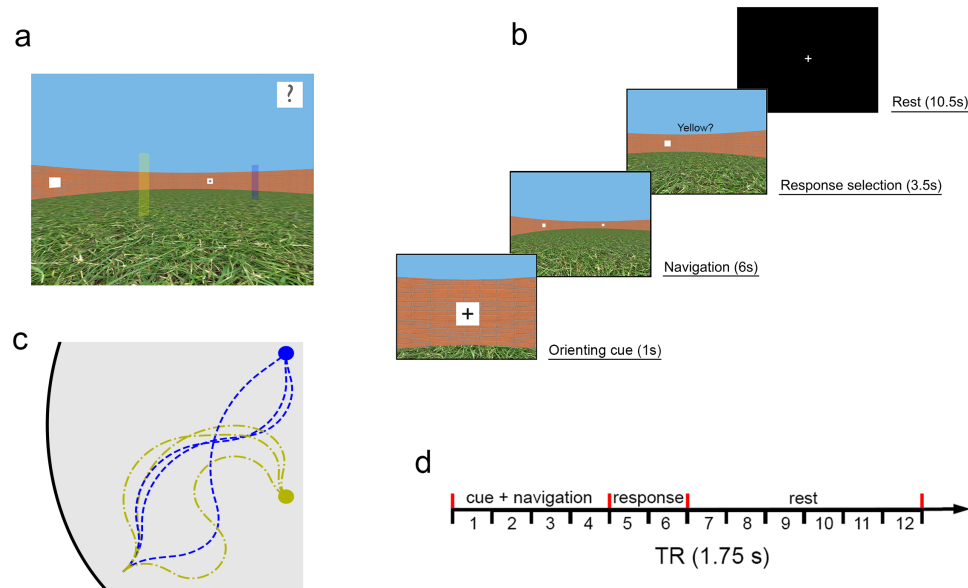

**Figure 1.** Schematics of the virtual environment and task. **a.** First person view of the environment during the training stage (beacons marking target locations are not visible in the main experiment). **b.** Sequence of events in a typical experimental trial. **c.** Schematics of the path structures used in the experiment. Participants were led to the target location via in total 24 (three paths from each landmark to each beacon) different curvilinear paths of equal length. **d.** Experimental time course of each trial relative to the image acquisition sequence (1.75 s per volume).

86 to create the virtual maze and to administer the task. Stimuli were presented on a PC connected to a liquid  
87 crystal display projector (1280 × 980 resolution) that back projected stimuli onto a screen located at the head  
88 end of the scanner bed. Participants laid on their back within the bore of the magnet and viewed the stimuli  
89 via a mirror that reflected the images displayed on the screen. The distance to the screen was 90 cm (12 cm  
90 from eyes to mirror) and the visible part of the screen encompassed ~22.0° × 16.4° of visual angle (35.5 × 26  
91 cm).

92 Before conducting fMRI imaging, participants were assessed and trained using a three-stage procedure  
93 to ensure an adequate level of task performance, which depends on familiarity with the arena layout. These  
94 behavioural training sessions were scheduled one to two days before the fMRI scanning session. In the first  
95 training stage, participants were allowed to freely navigate the virtual environment for three minutes, using  
96 a joystick held in their right hand. During this stage, all four wall landmarks and the two beacons that marked  
97 the target locations (yellow and blue) were visible. In the second stage of the training only the two beacons  
98 and one of the peripheral landmarks were visible at a time, and the participants' task was to navigate to the  
99 location of one of the other three landmarks, indicated by a small cue (an image of the landmark) at the top of  
100 the computer screen. Each participant completed at least 24 trials of this task. The third stage of the training  
101 procedure was almost identical to the actual task described earlier, except the yellow and blue beacons  
102 marking the two target locations were visible during the first six trials, feedback was provided for 1.5 s after  
103 each button press (i.e. "correct"/"incorrect"), and the interval between trials was just 2 s. Each participant  
104 completed at least 24 trials of this task. When participants achieved a performance level of >90% correct in  
105 the last stage of the training they were admitted to the fMRI session. At the beginning of the scanning session,  
106 during the acquisition of the structural images, participants performed another iteration of the training tasks  
107 to refamiliarize them with the environment.

### 108 MRI acquisition

109 Brain images were acquired on a 3T MR scanner (Trio; Siemens) fitted with a 32-channel head coil. For the  
110 functional data, 25 axial slices (voxel size 1.5 × 1.5 × 1.5 mm, 10% distance factor) were acquired using a gra-  
111 dient echo echoplanar T2\*-sensitive sequence (repetition time, 1.75 s; echo time, 30.2 ms; flip angle, 73°;  
112 Acceleration factor (GRAPPA), 2; matrix, 128 × 128; field of view, 190 × 190 mm). In each of five runs, 294 vol-  
113 umes were acquired for each participant; the first four images were discarded to allow for T1 equilibration.

114 We also acquired a T1-weighted structural MPRAGE scan. To minimize head movement, all participants were  
115 stabilized with tightly packed foam padding surrounding the head.

## 116 **Data analysis**

### 117 **Preprocessing**

118 Image preprocessing was carried out using SPM12 (Wellcome Department of Imaging Neuroscience, Univer-  
119 sity College London). Functional data volumes were slice-time corrected and realigned to the first volume. A  
120 T2\*-weighted mean image of the unsmoothed images was coregistered with the corresponding anatomical  
121 T1-weighted image from the same individual. The individual T1 image was used to derive the transformation  
122 parameters for the stereotaxic space using the SPM12 template (Montreal Neurological Institute template),  
123 which was then applied to the individual coregistered EPI images. Further, to exclude voxels with spurious  
124 signals, we removed all voxels with a raw intensity of zero at any time during the timeseries (RH:  $0.37 \pm 0.20\%$ ,  
125 LH:  $0.83 \pm 0.54\%$ , RPH:  $2.0 \pm 1.3\%$ , LPH:  $4.4 \pm 3.1\%$ ; mean  $\pm$  SD%,  $n = 18$ ).

126 Two alternative approaches of detrending were used to assess their potential differential effect on de-  
127 coding performance. (1) To make use of global information about unwanted signals, images were detrended  
128 using a voxel-level linear model of the global signal (LMGS; Macey et al. (2004)) to remove high-frequency as  
129 well as low-frequency noise components due to scanner drift, respiration, or other possible background sig-  
130 nals. (2) To remove spatiotemporally confined signal drift and artefacts, runwise polynomial detrending was  
131 performed on region of interest (ROI) data (see below). By default, second order polynomial detrending was  
132 used (SPM, Wellcome Department of Imaging Neuroscience, University College London, London, UK).

133 Based on existing evidence that in humans the right hippocampus should be the most likely region to  
134 produce a place code (Burgess et al., 2002), we used the AAL atlas (Tzourio-Mazoyer et al., 2002) and WFU  
135 pickatlas tool (Maldjian et al., 2003) to generate a right hippocampal (RH) ROI mask. For additional control  
136 analyses, we also generated ROI masks for the left hippocampus (LH), left parahippocampal gyrus (LPH), and  
137 right parahippocampal gyrus (RPH). The masks were separately applied to the 4D timeseries using Matlab  
138 2015b (Mathworks, Inc.).

### 139 **Multivariate pattern classification**

140 We performed a ROI-based multivariate analysis (Haynes, 2015) designed to test whether fMRI activation  
141 patterns in the human hippocampus carry information about the participants' position in the virtual envi-  
142 ronment. The fMRI BOLD signal has an inherent delay relative to stimulus onset of  $\sim 2$  s until it increases  
143 above baseline, and  $\sim 5$  s to peak response (Huettel et al., 2014). To account for this delay, we selected for  
144 the analysis the volumes corresponding to the period of 3.5–5.25 s after participants arrived at the target  
145 location (i.e. fMRI TR #7 of our 12-TR trial structure, see Figure 1d). The volume selection approach is analo-  
146 gous to that employed by Hassabis et al. (2009) and Rodriguez (2010).

147 The goal of our multivariate analysis was to test whether we could classify the virtual location of the  
148 participant using the selected volumes. The classification was performed using a linear support vector ma-  
149 chine (Haynes, 2015), denoted here as LSVM, implemented in Matlab 2015b (Mathworks Inc.). Two data sets  
150 were constructed, one with correct labels (location 1 or location 2), and one with randomly shuffled labels.  
151 Each data set was then randomly partitioned into 10 subgroups (or folds), split evenly between its class la-  
152 bels (stratification). The classifier was trained on 9 folds (training data), and its performance cross-validated  
153 on the remaining fold (withheld test data), once for each of the 10 possible combinations of train and test  
154 folds. We repeated this procedure 1,000 times for each participant (i.e. 1,000 random 10-fold stratified cross  
155 validations), which allowed us to estimate the distribution of classification accuracy with (true class labels)  
156 and without (shuffled class labels) class information, as well as the distribution of classification accuracy  
157 associated with randomly partitioning the data, referred to here as partition noise. Estimating a distribution  
158 for partition noise is an additional step from standard application of SVM to MVPA, where typically a single  
159 partition of the correct label data is used. A major goal of MVPA is to determine whether novel multivoxel  
160 patterns can be used to predict their true class labels, and there is no way to know a priori how any particular  
161 choice of trial assignment among folds affects such predictive capability. Our 1,000 random partitions of the  
162 data using true class information allows us to characterise this partition noise distribution.

### 163 **Positive control and additional verification analyses**

164 As a direct comparison using the same data and preprocessing steps, we replicated the ROI-based SVM anal-  
165 ysis to classify two distinct phases within each trial, which we expected to be different at the voxel level  
166 (i.e. a positive control). Given that the right hippocampus is known to show task-related activity during spa-  
167 tial navigation tasks (Baumann et al., 2010, 2012; Baumann and Mattingley, 2013), we hypothesized that  
168 the hippocampus should express differential fMRI activity patterns during the navigation period of our task  
169 compared to the rest period. Taking the delay in the BOLD response into account, we chose fMRI image #4  
170 (navigation) and #12 (rest) of our 12-image trial structure for this comparison (see Figure 1d).

171 In addition, to eliminate the possibility that negative results could be due to our choice of preprocessing  
172 methods, classifier, brain region or fMRI images (i.e. time to signal peak) we conducted several additional  
173 analyses to verify the null results. First, to exclude that a particular choice of signal detrending was subopti-  
174 mal, we performed the same analysis using both LGMS and 2nd order polynomial detrending (see *Preprocess-*  
175 *ing*). Second, to exclude the possibility that image smoothing may have impaired the discriminability of the  
176 fMRI signal we repeated the analysis using unsmoothed images (Kamitani and Sawahata, 2010). Third, we  
177 explored whether there was any decodable signal in the left hippocampus (LH ROI). Fourth, to test whether  
178 decoding of location information could be improved by averaging fMRI signals over a longer period (i.e. sev-  
179 eral images), we conducted analyses averaging two (i.e. image #7–#8), as well as three consecutive fMRI  
180 images (i.e. image #7–#9). In total, this yielded 24 classification analyses. Finally, to investigate whether  
181 there could be voxel place codes that are non-linearly separable, we repeated the same analyses using a  
182 radial basis function (Gaussian) SVM (Song et al., 2011), denoted here as RSVM.

### 183 **Multivariate searchlight analysis**

184 In addition to the ROI-based classification approach, we also employed so-called searchlight decoding (Krie-  
185 geskorte et al., 2006). In this approach, a classifier is applied to a small, typically spherical, cluster of voxels  
186 (i.e. the so-called searchlight). The searchlight is then moved to adjacent locations and the classification re-  
187 peated. This approach has the advantage that the dimensionality of the feature set is reduced, i.e. the mul-  
188 tivariate pattern consist of fewer voxels, and makes the analysis more sensitive to information contained  
189 in small local volumes. We followed the searchlight and detrending methods of Hassabis et al. (2009), us-  
190 ing spherical searchlights of 3-voxel radius (comprising a maximum of 121 voxels), on run-wise linearly de-  
191 trended data. LSVM was applied, using 100 random 10-fold stratified cross validations for each searchlight,  
192 both with and without class label information. Each label shuffle was identical amongst all searchlights to  
193 be compatible with subsequent population inferencing and correction for multiple comparisons (Allefeld  
194 et al., 2016).

195 We further included left and right parahippocampal regions in the searchlight analysis in order to com-  
196 pute differences in proportions of searchlights exceeding a classification accuracy threshold following Has-  
197 sabis et al. (2009). This analysis quantifies the difference between the proportion of searchlights in the hip-  
198 pocampal and parahippocampal regions which exceeded the 95<sup>th</sup> percentile classification threshold com-  
199 puted from shuffled location labels. To determine if the difference in proportions was greater than expected  
200 by chance, Hassabis et al. (2009) estimated the standard error of the difference-of-proportions using a stan-  
201 dard result, implicitly assuming statistical independence between searchlight accuracies (but see *Evaluation*  
202 *of analysis used in Hassabis et al. (2009)* for further details on the problems of this assumption). Due to the  
203 computing load, this analysis was implemented in Python v3.5 on a 300-node cluster.

### 204 **Population inference using a permutation-based approach**

205 For population inference, we followed the nonparametric, permutation-based approach of Allefeld et al.  
206 (2016). Allefeld and colleagues provided strong arguments that the random-effects analysis implemented  
207 by the commonly used t-test fails to provide population inference in the case of classification accuracy or  
208 other ‘information-like’ measures, because the true value of such measures can never be below chance level,  
209 rendering it effectively a fixed-effects analysis. The reason is that the mean classification accuracy will be  
210 above chance as soon as there is an above-chance effect in only one person in the sample. As a result, t-  
211 tests on accuracies will with high probability yield ‘significant’ results even though only a small minority of  
212 participants in the population shows above-chance classification.

213 A further advantage of the approach of Allefeld et al. (2016) is the ability to estimate the population preva-  
214 lence when the prevalence null hypothesis is rejected. This enables direct quantification of the generalisabil-

ity of a positive finding in the population.

Briefly, first level permutations (within-participant) were classification accuracies where class labels are randomly shuffled, together with one classification accuracy with correct labels. Second level permutations (between-participant) were random combinations of first level permutations across participants, with one of the second level permutations consisting of accuracies from all correct labels (to avoid p-values of zero). The minimum statistic was used across subjects for each comparison (e.g. searchlight or ROI), and for each second-level permutation. For each second-level permutation, the maximum statistic across comparisons was computed to correct for multiple comparisons (Allefeld et al., 2016; Nichols and Holmes, 2001). Since the maximum statistic does not depend on the amount or nature of statistical dependence between comparisons, it is applicable to classification accuracies of overlapping regions such as searchlights (Allefeld et al., 2016; Nichols and Holmes, 2001). By the same reasoning, it is also applicable to multiple comparisons across different analyses of the same ROI, such as SVM classification following different preprocessing methods. Here, we computed the maximum statistic across all ROIs and preprocessing methods (*Extended analysis of negative results*), and also the maximum statistic across searchlights in each ROI (*Multivariate searchlight analysis*).

### Stochastic binomial model for shuffled labels

We developed a stochastic binomial model of classification accuracy based on the null hypothesis, and cross-validation analysis parameters. Each test volume was assumed to be classified stochastically with classification success governed only by the null hypothesis probability  $p_0$ . For  $k$ -fold cross-validation ( $k$ -fold CV), there are  $n_f = N_T/k$  binary choices for each of  $k$  folds, averaged to give the accuracy of a single partition set (stratified, non-overlapping hold-out sets). Assuming the training data is entirely devoid of information, then performance on test data must be at chance, i.e.,

$$X \sim B(x; 1, p_0) \quad (1)$$

The sample probability of a successful prediction per fold is the number of successful predictions averaged over each fold, i.e.,

$$S = \bar{X} = \frac{1}{n_f} \sum_{i=1}^{i=n_f} X_i \quad (2)$$

Then the variance of the prediction success per trial is

$$V(S) = V\left(\frac{1}{n_f} \sum_{i=1}^{i=n_f} X_i\right) = \frac{1}{n_f^2} \left(\sum_{i=1}^{i=n_f} V(X_i)\right) = \frac{1}{n_f^2} n_f p_0(1-p_0) = \frac{p_0(1-p_0)}{n_f} \quad (3)$$

assuming statistical independence between scores within a fold. For truly random partitions and large  $N_T$ , this seems a good approximation since volumes in close temporal proximity are rare. Thus if the training data is not informative, then the test data are all essentially independent.

The SVM's  $k$ -fold CV accuracy from each random partition is the prediction success averaged over all  $k$  folds. It is tempting to estimate the variance of the average prediction success as

$$V_{null}(\bar{S}) = V_{null}\left(\frac{1}{k} \sum_{i=1}^{i=k} S_i\right) = \frac{1}{k^2} \sum_{i=1}^{i=k} V(S_i) = \frac{1}{k} V(S) = \frac{p_0(1-p_0)}{n_f k} = \frac{p_0(1-p_0)}{N_T} \quad (4)$$

by assuming that folds are statistically independent. The problem is that although folds are predicted based on uninformative training data, uninformative is *not* the same as independent. This is because two training sets overlap by  $(N_T - 2n_f)/(N_T - n_f)$  since the data points are drawn from the same set.

The more general form of Equation 4 accounts for covariance terms, i.e.,

$$\begin{aligned} V_{null}(\bar{S}) &= V_{null}\left(\frac{1}{k} \sum_{i=1}^{i=k} S_i\right) = \frac{1}{k^2} V\left(\sum_{i=1}^{i=k} S_i\right) = \frac{1}{k^2} \left(\sum_{i=1}^{i=k} V(S_i) + \sum_{i \neq j} Cov(S_i, S_j)\right) \\ &= \frac{1}{k^2} \left(\frac{k p_0(1-p_0)}{n_f} + \sum_{i \neq j} \rho V(S)\right) \\ &= \frac{1}{k^2} \left(\frac{k p_0(1-p_0)}{n_f} + \rho(k-1)k \frac{p_0(1-p_0)}{n_f}\right) \\ &= \frac{p_0(1-p_0)}{N_T} (1 + \rho(k-1)) \end{aligned} \quad (5)$$

249 where the correlation coefficient

$$\rho = \frac{Cov(S_i, S_j)}{V(S)} \quad (6)$$

250 remembering that  $V(S_i) = V(S_j) = V(S)$ . Thus the variance of the null distribution can be written as a  
 251 function of the null hypothesis probability  $p_0$  and the CV parameters, i.e.,

$$V_{null}(\bar{S}) = V_{null}(p_0, \theta) \quad (7)$$

252 where the CV parameter  $\theta = (N_T, k)$ . At present, the correlation coefficient is found empirically assuming  
 253 each voxel's signal is independent, normally distributed random noise. Using synthetic noise data instead  
 254 of fMRI data guarantees there is no classifiable signal in keeping with the null hypothesis, and also enables  
 255 predictions to be made when designing new experiments. We generated  $10^5$  noise data sets,  $n_{vox} = 3053$   
 256 (for RH),  $N_T = 120, k = 10$ . Using LSVM,  $\rho = 0.0741$ .

257 For computational efficiency, we used a Gaussian approximation of the binomial model

$$f_{null}(\bar{S}|p_0, \theta) = \frac{1}{\sqrt{2\pi V_{null}(p_0, \theta)}} \exp\left(\frac{-(\bar{S} - p_0)^2}{2V_{null}(p_0, \theta)}\right) \quad (8)$$

### 258 Stochastic binomial model for true labels

259 To model the partition noise of individuals, we cannot model the classification of individual volumes as  
 260 Bernoulli trials. This is because the partitioning regime ensures that every volume is used once and only  
 261 once as test data in each random partition set. Since the labels remain unchanged, there is in fact no ran-  
 262 domness in terms of the test data, i.e.,

$$\bar{S} = \frac{1}{k} \sum_{i=1}^{i=k} S_i = \frac{1}{N_T} \sum_{i=1}^{i=N_T} X_i \quad (9)$$

263 No matter how the data is partitioned, the pairing of  $X_i$  and its label remains unchanged. Therefore  $\bar{S}$  is  
 264 constant and

$$V(\bar{S}) = 0 \quad (10)$$

265 The problem here is that although the test data is identical over each complete partition set, the training data  
 266 varies. That is, for  $X_i$  in two partition sets, the corresponding training data differs. This difference creates  
 267 variability in the classification outcome. For shuffled labels, this variability was irrelevant since classification  
 268 outcomes were already assumed to be maximally independent. To account for the training set variability  
 269 using true labels, we can reframe the problem as one where the test data is the reference, and we model  
 270 how the training data varies with random partitions. Now the random partitions have substantial overlap  
 271 so that only a small fraction are truly independent between partition sets. For a given test data point  $X_i$ , we  
 272 can estimate the effective number of independent samples per fold, denoted as  $n_f'$ . Following Equation 3,

$$V(S') = \frac{1}{n_f'^2} n_f' p_1 (1 - p_1) \quad (11)$$

273 where  $p_1$  denotes the mean probability of success for that data set (volumes and labels combination). Us-  
 274 ing Equation 11 but otherwise following the same logic as the derivation of Equation 5, the variance of the  
 275 distribution due to partition noise is estimated by:

$$\begin{aligned} V_{part}(\bar{S}) &= V_{part}\left(\frac{1}{k} \sum_{i=1}^{i=k} S_i\right) = \frac{1}{k^2} V\left(\sum_{i=1}^{i=k} S_i\right) = \frac{1}{k^2} \left(\sum_{i=1}^{i=k} V(S_i) + \sum_{i \neq j} Cov(S_i, S_j)\right) \\ &= \frac{1}{k^2} \left(kV(S') + \sum_{i \neq j} \rho V(S')\right) \\ &= \frac{1}{k^2} (k + \rho(k-1)k) V(S') \\ &= \frac{p_1(1-p_1)}{N_T} (1 + \rho(k-1)) \frac{n_f'}{n_f} \end{aligned} \quad (12)$$

276 Now the factor  $n_f'/n_f$  is the fraction of data that is independent. Since the problem is reframed as one  
 277 of variability in training data, the fraction is equivalently expressed as the fraction of training data that is

278 independent, given a test data point  $X_i$ . For large  $k$  and random partitioning, few of the remaining  $n_f -$   
 279 1 points in a fold with shared  $X_i$  would be the same across partition sets. As a first order approximation,  
 280 assume that all  $n_f - 1$  points are different, so that the fraction of distinct, and hence independent, data  
 281 points in each training set is

$$\frac{n_f'}{n_f} \approx \frac{n_f - 1}{N_T - n_f} \quad (13)$$

282 Substituting Equation 13 into Equation 12 we get:

$$V_{part}(\bar{S}) = V_{part}(p_1, \theta) \approx \frac{p_1(1-p_1)}{N_T} (1 + \rho(k-1)) \frac{n_f - 1}{N_T - n_f} \quad (14)$$

283 where the CV parameter  $\theta = (N_T, k)$ . For computational efficiency, we used a Gaussian approximation of  
 284 the binomial model:

$$f_{part}(\bar{S}|p_1, \theta) = \frac{1}{\sqrt{2\pi V_{part}(p_1, \theta)}} \exp\left(\frac{-(\bar{S} - p_1)^2}{2V_{part}(p_1, \theta)}\right) \quad (15)$$

### 285 Bayes Factor analysis

286 We defined a Bayes factor contrasting an alternative hypothesis with the null hypothesis:

$$BF_{10} = \frac{\int_{p_1} f_{part}(\bar{S}|p_1, \theta) f_1(p_1) dp_1}{f_{null}(\bar{S}|p_0, \theta)} = \frac{Pr(\bar{S}|H_1, \theta)}{Pr(\bar{S}|H_0, \theta)} \quad (16)$$

287 where the commonly used subscript  $_{10}$  denotes the alternative hypothesis is in the numerator and the null  
 288 is in the denominator. Using the model for an individual's true classification (unshuffled labels), we can  
 289 compute the likelihood for the null hypothesis and the likelihood for the alternative averaged over a prior  
 290 distribution  $f_1$ . The typical prior distribution used is the most uninformative distribution that still converges  
 291 for the Bayes factor calculation. For open intervals, that is usually the Cauchy distribution. In our case,  
 292 classification rates cannot exceed 1, so the least-informative distribution is uniform between 0.5 (null) and  
 293 1, i.e.,

$$\begin{aligned} H_0 : p_0 &= 0.5 \\ H_1 : p_1 &\in (0.5, 1] \end{aligned} \quad (17)$$

294 The uniform prior assumes that perfect classification success is equally likely *a priori* as just above chance.  
 295 Although using the least informative prior potentially reduces unintended bias in the analysis, it also runs the  
 296 risk of raising the threshold for finding evidence for the alternative, thereby seemingly favour the null. To test  
 297 this possibility, two other prior distributions were also used for the alternative hypothesis, namely, a linear  
 298 and quadratic distribution both maximal at  $p = 0.5$  and decreasing to zero at  $p = 1$ . These distributions  
 299 weight any alternative hypothesis  $p$  near 1 as less likely than the uniform prior.

300 For  $0.5 < p_1 \leq 1$ , the three prior probability density functions of  $p_1$  used were

$$f_1(p_1) = \left\{ \begin{array}{ll} 2 & \text{Uniform} \\ 8(1-p_1) & \text{Linear} \\ 24(1-p_1)^2 & \text{Quadratic} \end{array} \right\} \quad (18)$$

301 The density functions of Equation 18 were substituted one at a time into Equation 16, and combined with  
 302 Equation 8 and Equation 15 to estimate the Bayes factor Equation 16. Note that for computing Bayes factor  
 303 for location classification,  $\theta = (120, 10)$ , and for task classification,  $\theta = (240, 10)$ .

304 Assuming that *a priori*, the null hypothesis and weighted alternative hypothesis are equally likely, i.e.,  
 305  $Pr(H_1) = Pr(H_0)$ , then the Bayes factor is

$$BF_{10} = \frac{\int_{p_1} f_{part}(\bar{S}_{n_f}|p_1, \theta) f_1(p_1) dp_1}{f_{null}(\bar{S}_{n_f}|p_0, \theta)} = \frac{Pr(H_1|\bar{S}_{n_f}, \theta) Pr(H_1)}{Pr(H_0|\bar{S}_{n_f}, \theta) Pr(H_0)} = \frac{Pr(H_1|\bar{S}_{n_f}, \theta)}{Pr(H_0|\bar{S}_{n_f}, \theta)} = \frac{L(H_1)}{L(H_0)} \quad (19)$$

306 which is the relative likelihood of the alternative hypothesis to the null hypothesis, given the data and CV  
 307 parameters. Consequently a large BF means more evidence for  $H_1$ , and a small BF means more evidence for  
 308  $H_0$ , as defined by  $f_{part}$ ,  $f_1$  and  $f_{null}$ .



## 309 Results

### 310 Behavioural performance

311 We set a stringent *a priori* performance criterion of 90% accuracy, to ensure that the participants were ori-  
312 ented during the task. This was necessary to minimize the possibility that failure to decode location from  
313 fMRI data could be due to poorly oriented participants.

314 The 18 participants included in the fMRI analysis had an average performance accuracy of  $98.25 \pm 0.56\%$   
315 (mean  $\pm$  SEM). Remarkably, 50% of the participants did not commit a single error in 120 trials. Furthermore,  
316 the accuracies for target location 1 (mean  $\pm$  SEM,  $97.5 \pm 0.8\%$ ) and target location 2 ( $98.9 \pm 0.4\%$ ) were indis-  
317 tinguishable ( $p = 0.07$ ,  $w_9 = 38$ , Wilcoxon signed rank test), as were response times (mean  $\pm$  SEM,  $0.72 \pm 0.03$  s  
318 for target location 1,  $0.75 \pm 0.03$  s for target location 2;  $p = 0.09$ ,  $w_{18} = 124$ ,  $z = 1.7$ , Wilcoxon signed rank test).

### 319 Multivariate ROI analysis

320 Despite behavioural data demonstrating that participants were spatially oriented during the task, the multi-  
321 voxel classifier could not predict location based on right hippocampal fMRI data. Figure 2a depicts a typical  
322 participant's results for the classification of location, using our default method (i.e. LMGS detrending, 3 mm  
323 Gaussian smoothing, LSVM). As expected, the accuracy following random label-shuffles was distributed ar-  
324 ound the theoretical chance level of 0.5, since the shuffle process removes true location information. If mul-  
325 tivoxel patterns were predictive of location in the virtual arena, then accuracies of the unshuffled data sets  
326 should be at or beyond the positive extreme of the shuffled distribution. Instead, unshuffled distributions  
327 were centred within the shuffled null distribution in all participants, arguing against the presence of loca-  
328 tion information at the voxel level. Notably, the variability in the unshuffled distribution can only be due  
329 to random partitioning itself since the set of unshuffled labels is unique. Thus if only a single partition is  
330 used, which is standard practice currently, it is unclear to which part of the partition distribution it might  
331 correspond (Figure 3a, red distribution). Therefore, to account for partitioning noise, statistical inferencing  
332 using cross-validation methods should be based on a sample of random partitions, or at least incorporate  
333 an estimate of partition noise variance. Using the default method, the partition noise variance in our data  
334 was  $24 \pm 2\%$  (mean  $\pm$  SD,  $n = 18$ ) of the corresponding null distribution variance. For normally distributed  
335 independent random variables, if the true null variance is 24% larger than assumed, there would be 7.8%  
336 false positives at  $p < 0.05$ , and 2.1% at  $p < 0.01$  (2-tailed false positive % =  $100 \times \text{erfc}(\text{erf}^{-1}(1 - p)/\sqrt{1.24})$ ),  
337 potentially inflating false positive conclusions by 1.5- to 2-fold.

338 For completeness, we submitted individual classification results from the 18 participants to a group anal-  
339 ysis according to Allefeld et al. (2016). The prevalence null hypothesis states that the proportion of partici-  
340 pants in the population having an above-chance location classification is zero. Figure 2b shows the group  
341 results for our default analysis where the group  $p > 0.1$  for all random partitions, consistent with the null  
342 hypothesis that there is zero prevalence of location information in the population. Importantly, there was  
343 no evidence here that the conclusion may be affected by the instance of random partition of data used for  
344 cross-validation.

### 345 Extended analysis of negative results

346 To investigate whether negative results could be due to our choice of preprocessing method, classifier, brain  
347 region or fMRI images (i.e. time period) we conducted several additional analyses to verify their validity. Fig-  
348 ure 3 shows results for location classification across 24 different analysis approaches, including an alterna-  
349 tive preprocessing method (second order runwise polynomial detrending), varying the number of consecu-  
350 tive images used for analysis, including left hippocampus, and including RSVM in addition to LSVM. Using  
351 LSVM, the median corrected group level  $p$ -value for the location classification under the prevalence null hy-  
352 pothesis exceeded 0.05 in all cases (Figure 3, left). In fact, even the lower limit of the 95% confidence interval  
353 of the  $p$ -value (arising from partition noise) exceeded 0.05. The same was true using RSVM (Figure 3, right).  
354 Our results also discount the possibility of a very weak but genuine voxel code that is by some means lost  
355 through the correction for multiple comparisons, since the median uncorrected  $p$ -value was never close to  
356 0.05 (all  $p > 0.3$ ). Therefore, no evidence for a classifiable voxel code for location was found, despite >98%  
357 mean behavioural orientation accuracy. Notably, there was no evidence that any particular choice of prepro-  
358 cessing method, classifier, ROI or timing made a significant improvement to location classification accuracy.

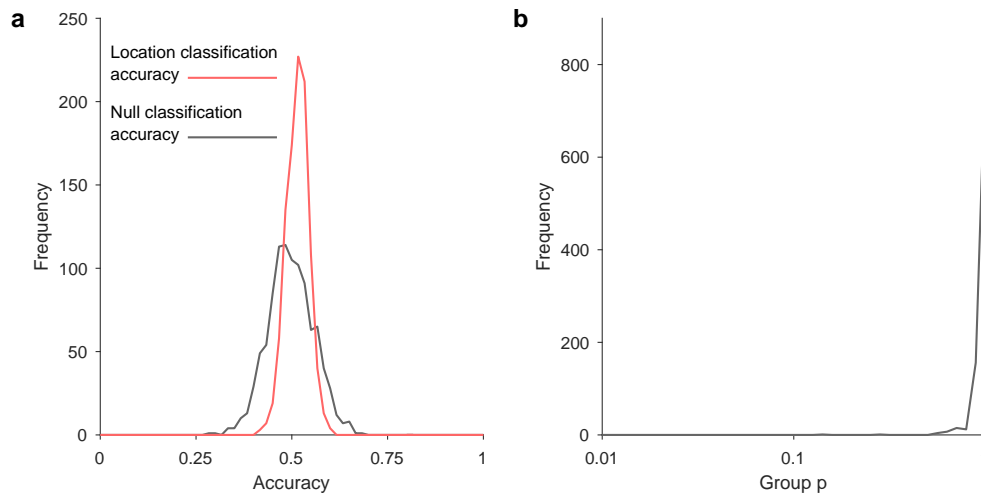

**Figure 2.** Results from right hippocampus for location classification. **a.** A typical individual participant's distribution of classification accuracies (10-fold stratified cross-validation results) for location in the virtual arena, over 1,000 random label-shuffles (black) and 1,000 random partitions of true labels (red). **b.** Population inference results for location classification following Allefeld et al. (2016) show no evidence of a place code (18 participants, one p-value computed for each of the 1,000 random partitions).

### 359 Multivariate searchlight analysis

360 One possibility for a negative result may have been the “curse of dimensionality” because the data dimen-  
361 sionality (e.g. 3053 voxels in right hippocampus) is substantially higher than the number of data points avail-  
362 able for classification (e.g. 60 visits to each location per participant). In fact, for both RSVM and LSVM, we  
363 found less than 1 classification error out of 120 when no data was withheld during training (averaged over  
364 participants, ROIs and preprocessing methods), showing that the problem was indeed of generalization to  
365 untrained data, rather than the separability of training data per se.

366 By restricting each classification problem to a small subregion of the ROI, searchlight analysis substan-  
367 tially reduces the data dimensionality, and has the potential to partially mitigate the dimensionality problem.  
368 Following Hassabis et al. (2009), we applied LSVM to spherical searchlights centred on each voxel in right  
369 and left hippocampus, and right and left parahippocampal gyrus (see *Methods* for details). This analysis pro-  
370 duced 100 (cross-validation) accuracy values for each voxel of each ROI of each participant, using shuffled  
371 labels. Additionally, we produced an equivalent set of results from 100 random partitions of unshuffled data  
372 (for each voxel of each ROI of each participant).

373 Next we looked for evidence of a place code in any individual participants' results using a nonparametric  
374 permutation analysis method (Nichols and Holmes, 2001). This approach avoids the need to make *a priori*  
375 assumptions about the data (which is implicit if statistical parametric maps are used). Beginning with the  
376 searchlight classification accuracy results, over each ROI, the maximum classification accuracy was found  
377 for each shuffled data set, and for each random partition of the unshuffled data set. We then found the num-  
378 ber of random partitions (out of 100) for which the maximum statistic of the unshuffled searchlight results  
379 exceeded the 95% threshold of the shuffled searchlight results. If there is no signal, approximately five parti-  
380 tions should exceed the 95% threshold by chance. Across all ROIs, the mean number of partitions above the  
381 95% threshold did not exceed 5/100 (mean  $\pm$  SEM / 100, RH =  $3.2 \pm 0.7$ , LH =  $2.5 \pm 0.8$ , RPH =  $3.7 \pm 0.7$ , LPH =  $4.1$   
382  $\pm 1.1$ ), showing no evidence of above-chance classification for location. We then asked whether it was pos-  
383 sible that there could be a weak place signal which for some reason did not reach the arbitrary threshold of  
384 95% of the shuffled data's maximum statistic. We tested this possibility by counting the number of shuffled  
385 maximum statistics that each random partition's unshuffled maximum statistic exceeded. The presence of  
386 a positive bias (>50%) may still suggest a weak but genuine place signal. Instead, no positive bias was found  
387 in any ROI (mean  $\pm$  SEM, RH =  $45 \pm 3\%$ , LH =  $41 \pm 3\%$ , RPH =  $44 \pm 3\%$ , LPH =  $44 \pm 3\%$ ).

388 In addition to the individual analysis, we also performed a group permutation test following Allefeld et al.  
389 (2016). Permutation-based information prevalence inference using the minimum statistic was used to deter-  
390 mine if there is statistical evidence for a location code in the population (see Table 1). We started with the  
391 same searchlight classification accuracy results as above. In contrast to individual analysis, the minimum

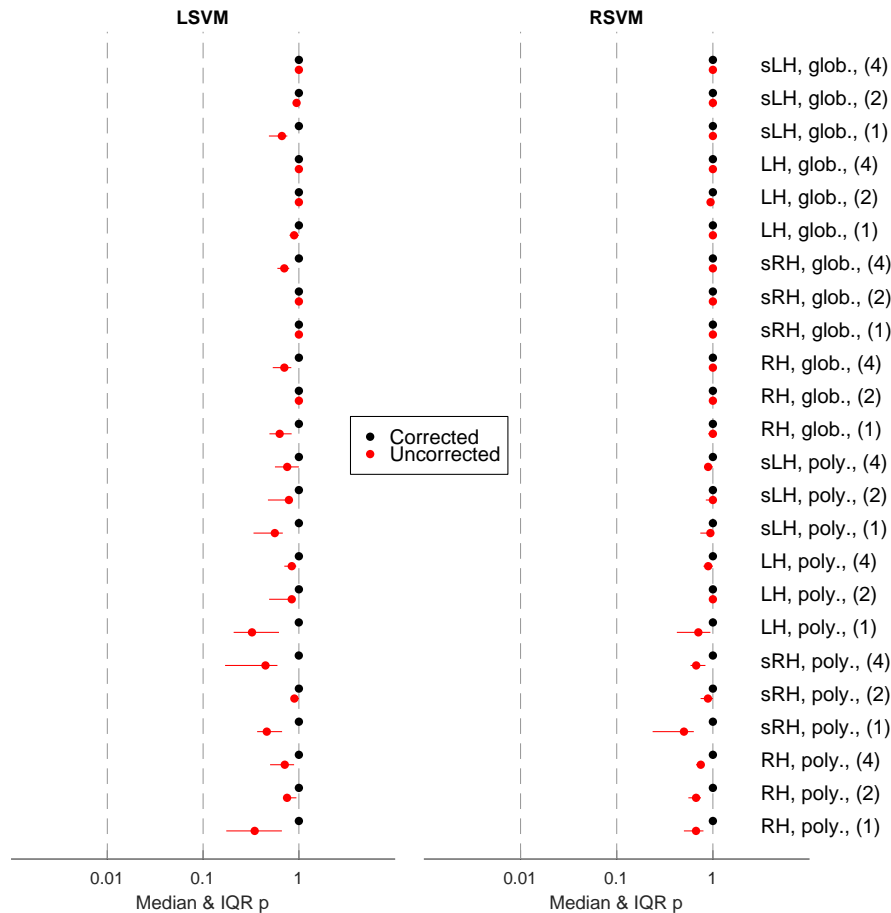

**Figure 3.** Overview of group significance results for different analysis approaches for the location classification following Allefeld et al. (2016), showing median as well as interquartile range. Abbreviations: glob. = Linear Model of the Global Signal detrending, H = hippocampus, L = left, R = right, LSVM = linear support vector machine, poly. = polynomial detrending (2<sup>nd</sup> order), RSVM = support vector machine with radial basis function (Gaussian) kernel, s = smoothed (Gaussian kernel, radius = 3 mm). Numerals (i.e. 1, 2, and 4) indicate number of consecutive images used for classification analysis.

392 statistic was first found for all searchlights across participants, in each ROI. We used 10,000 second-level per-  
 393 mutations, each of which was a random sample of one shuffled data set from each participant (one permu-  
 394 tation was the unshuffled data). The minimum accuracy was found across participants, for each searchlight  
 395 of each permutation.

396 For each voxel, the uncorrected p-value was the fraction of permutation values of the minimum accuracy  
 397 that was larger than or equal to the unshuffled data. Hence if the unshuffled accuracy is very high, very few  
 398 of the permutation values will exceed it (low p-value). Since one permutation was the unshuffled data, the  
 399 minimum p-value was  $10^{-4}$ . Even without correction for multiple comparisons, we found  $p < 0.05$  in fewer  
 400 than 4% of voxels in each ROI.

401 To correct for multiple comparisons (multiple searchlights), the maximum statistic (across searchlights)  
 402 of the minimum accuracy (across participants) was computed. The p-value of the spatially extended global  
 403 null hypothesis was the fraction of permutations in which the maximum statistic was larger than or equal to  
 404 the unshuffled data. Across all random partitions, on average < 1 voxel reached  $p < 0.05$  in each ROI (Table  
 405 1). Taken together, both uncorrected and corrected group results argue against the presence of location  
 406 information in the searchlight accuracy values.

407 There remain a number of possible reasons that a place signal may not have been detected using the  
 408 ROI-based and searchlight based multivariate classification methods described. One possibility is that the

**Table 1.** Group permutation test results showing the number of voxels for which  $p < 0.05$  in each ROI, averaged across 18 participants.

| ROI | Mean $\pm$ SD no. voxels $p < 0.05$ , uncorrected | Mean $\pm$ SD no. voxels with $p < 0.05$ , corrected | Total no. voxels (common to all participants) |
|-----|---------------------------------------------------|------------------------------------------------------|-----------------------------------------------|
| RH  | 74 $\pm$ 14                                       | 0.01 $\pm$ 0.10                                      | 2533                                          |
| LH  | 91 $\pm$ 17                                       | 0.01 $\pm$ 0.10                                      | 2505                                          |
| RPH | 73 $\pm$ 14                                       | 0.01 $\pm$ 0.10                                      | 2157                                          |
| LPH | 59 $\pm$ 14                                       | 0.02 $\pm$ 0.14                                      | 1720                                          |

409 signal-to-noise ratio is too small to allow signal detection given the size of the training sets used for the  
410 classifier, or the number of participants tested in the case of group results. However, a number of studies  
411 have been reported that seemingly showed a voxel-level place signal using even fewer training points per  
412 participant, and fewer participants overall (Hassabis et al., 2009; Kim et al., 2017; Rodriguez, 2010; Sulpizio  
413 et al., 2014). Another possibility is that the analysis itself may be suboptimal for detecting this type of signal.  
414 To test this second possibility, we applied the difference-of-proportions analysis of Hassabis et al. (2009) to  
415 our searchlight accuracy values.

416 First, 10-fold stratified cross-validation results were pooled across all voxels in each ROI over 100 replica-  
417 tions where location labels were randomly shuffled. This represents a null distribution of searchlight-based  
418 classification accuracy values, devoid of location information. For each ROI, the number of unshuffled voxels  
419 whose classification accuracy exceeded the 95<sup>th</sup> percentile of the pooled distribution was found (Hassabis  
420 et al., 2009). The difference in the proportions of suprathreshold voxels was computed between all ROI pairs.  
421 According to Hassabis et al. (2009), finding a single proportion from each ROI avoids the problem of multi-  
422 ple comparisons across many searchlights within each ROI. We therefore replicated the analysis of Hassabis  
423 et al. (2009) immediately below, but show later that the implicit assumption of independence between se-  
424 archlights is flawed.

425 Surprisingly, approximately half of all ROI contrasts resulted in  $p < 0.05$  (Table 2). This suggests that the  
426 proportions of suprathreshold voxels differed between ROIs more than might be expected by chance. If the  
427 analysis is valid, this result may well imply that a multivariate voxel pattern exists in some (yet unexplained)  
428 location- and ROI-dependent manner. However, by virtue of including 100 random partitions, we could apply  
429 the same method to contrast two instances of the same ROI (diagonal cells of top-right section of Table 2).  
430 Clearly, a valid test should not detect a significant difference between the suprathreshold proportions arising  
431 from two random partitions of identical unshuffled data from the same ROI. Yet even for the same ROI, about  
432 half of all contrasts had  $p < 0.05$ . This suggests the false positive rate is at least an order of magnitude higher  
433 than it ought to be. On more careful inspection of the statistical methods used by Hassabis and colleagues,  
434 it becomes evident that the major reason is an underestimation of the test statistic's standard error.

### 435 Evaluation of analysis used in Hassabis et al. (2009)

436 Hassabis et al. (2009) compared the proportions of suprathreshold voxels identified through their standard  
437 searchlight analysis, from different ROI pairs. They then employed a commonly used formula (Daniel and  
438 Terrell, 1994) to estimate the standard error of the difference between two proportions, namely,

$$\widehat{SE}_p = \sqrt{p(1-p)\left(\frac{1}{n_1} + \frac{1}{n_2}\right)} \quad (20)$$

439 where the pooled proportion  $p$  is estimated by

$$\hat{p} = \frac{n_1 p_1 + n_2 p_2}{n_1 + n_2} \quad (21)$$

440 where  $n_1$  and  $n_2$  are the numbers of voxels in the two regions being contrasted, and  $p_1$  and  $p_2$  are the pro-  
441 portions of suprathreshold voxels in those regions. Using the estimated standard error from Equation 20, a  
442 Z-statistic was found which was then used to estimate the probability of a Type I error.

443 Using the estimated standard error from Equation 20 is incorrect here because the implicit assumption  
444 that independent Bernoulli-type outcomes contributed to the proportions being compared is violated. The

**Table 2.** Percentage of ROI contrasts with  $p < 0.05$  (top-right) difference-of-proportions method, 10,000 contrast pairs per participant, 18 participants (bottom-left) using shuffled data to estimate standard error of suprathreshold proportions, 10,000 contrast pairs per participant, 18 participants.

|     |           | RH        | LH        | RPH       | LPH     |     |
|-----|-----------|-----------|-----------|-----------|---------|-----|
|     |           | 55 ± 05   | 73 ± 14   | 66 ± 13   | 64 ± 14 | RH  |
| RH  | 0.5 ± 0.9 |           | 54 ± 05   | 61 ± 10   | 69 ± 17 | LH  |
| LH  | 3.9 ± 5.5 | 0.5 ± 0.9 |           | 53 ± 05   | 67 ± 15 | RPH |
| RPH | 3.5 ± 6.5 | 2.0 ± 4.1 | 0.6 ± 1.7 |           | 49 ± 05 | LPH |
| LPH | 1.8 ± 2.6 | 4.8 ± 7.5 | 4.4 ± 9.8 | 0.5 ± 1.0 |         |     |
|     |           | RH        | LH        | RPH       | LPH     |     |

445 proportion of suprathreshold voxels depends on the number of searchlights whose classification rates ex-  
 446 ceeded some threshold. However, each searchlight consists of a subpopulation of voxels, with substantial  
 447 overlap with neighbouring searchlights. Therefore, the information in searchlights cannot be considered as  
 448 independent. Indeed if one searchlight shows high classification accuracy, neighbouring searchlights that  
 449 consist of many of the same voxels are also likely to show similar classification rates. In addition to the  
 450 overlap of voxels between searchlights, neighbouring voxels themselves are known to show correlated ac-  
 451 tivity due to physiology (e.g., shared blood flow) and preprocessing (e.g. low-pass filtering) (Poldrack et al.,  
 452 2011). Empirically, we found a clear positive correlation between the classification accuracies of neighbour-  
 453 ing voxels in right hippocampus ( $r = 0.72$ ), right parahippocampal gyrus ( $r = 0.74$ ), left hippocampus ( $r = 0.74$ ),  
 454 and left parahippocampal gyrus ( $r = 0.74$ ). Neighbouring voxels were those centred no more than one voxel  
 455 width away (i.e. maximum of eight neighbours) and within the same ROI mask. Correlations were computed  
 456 between the mean accuracies of neighbouring voxels and the accuracies of the actual voxels themselves.

457 The assumption of independence between voxels therefore neglects the positive correlation between  
 458 voxels, which leads to underestimation of the standard error of the difference in supra-threshold propor-  
 459 tions. This in turn leads to underestimation of the probability of a Type I error. To test if the underestimation  
 460 of the standard error of the difference-of-proportions was the major reason for the high percentage of ROI  
 461 contrasts with  $p < 0.05$  (Table 2), we re-estimated the standard error directly using the shuffled searchlight  
 462 data. Using the same thresholding method as before, we computed 100 different supra-threshold propor-  
 463 tions for each ROI (corresponding to all the shuffled data). Hence, for each ROI contrast, there were 100  
 464 difference-of-proportion values from shuffled data, used to estimate the mean and standard error of the  
 465 null difference-of-proportions for that ROI contrast. For the same ROI pair (e.g. RH vs. RH), the standard er-  
 466 ror was estimated as the RMS of the other ROI pairs involving that ROI (e.g. RH vs. LH, RH vs. RPH, RH vs.  
 467 LPH). As before, a Z-statistic was calculated, and a two-tailed p-value estimated using a normal approxima-  
 468 tion. Using this simple estimate of the standard error of the difference of suprathreshold proportions, the  
 469 mean percentage of ROI contrasts with  $p < 0.05$  dropped to less than 5% (Table 2, bottom-left). These results  
 470 show that by using a more direct estimate of the standard error of difference-of-proportions, the percentage  
 471 of contrasts with  $p < 0.05$  is no more than expected by chance, arguing against an ROI-specific place code.

### 472 **Simulating faulty searchlight analysis using independent noise**

473 It is unclear how much of the correlation of searchlight accuracies is a result of searchlight overlaps per se,  
 474 and how much is a result of other factors such as shared blood flow or low-pass filtering which produces cor-  
 475 relations in BOLD signal. It may be that overlaps between neighbouring searchlights contribute minimally  
 476 to the underestimation of the standard error. If so, the problem should not exist if the underlying voxel data  
 477 is truly independent. To investigate this possibility, we repeated the Hassabis analysis on pure noise. We  
 478 generated 100 independent synthetic data sets by using Gaussian noise of the same mean, standard devia-  
 479 tion and spatial distribution as voxels in our human fMRI ROIs, assuming statistical independence between  
 480 all voxels. Analysis parameters were the same as for fMRI data. Note that the synthetic data sets were gen-  
 481 uinely independent rather than merely using label shuffles as is the case for fMRI data. Since there was no  
 482 true signal, we systematically excluded one data set at a time to simulate ‘unshuffled’ data (which should not  
 483 be classifiable). By pooling the voxels from the remaining 99 data sets, we set the 95<sup>th</sup> percentile threshold  
 484 for classification accuracy as before. The number of voxels exceeding threshold in each of 100 ‘unshuffled’

**Table 3.** Percentage of ROI contrasts with  $p < 0.05$  (pure noise example, difference-of-proportions method, 10,000 contrast pairs).

| %   | RH | LH | RPH | LPH |
|-----|----|----|-----|-----|
| RH  | 63 | 61 | 61  | 59  |
| LH  | 61 | 59 | 59  | 56  |
| RPH | 61 | 59 | 59  | 58  |
| LPH | 59 | 56 | 58  | 55  |

485 data sets were used along with pooled proportions, and the standard error of pooled proportions to calcu-  
486 late Z-statistics. Using Gaussian approximation, we estimated 2-tailed p-values of the Z-statistics. For each  
487 ROI contrast, all 10,000 possible pairs of data sets were used (100 random partitions from each ROI).

488 If searchlight overlaps per se do not make a significant contribution to the correlation in searchlight ac-  
489 curacies, then there should be approximately 5% false positives (by setting  $p < 0.05$ ) in the synthetic data.  
490 Instead, using the Hassabis method, there were more than 50% false positives in all ROI contrasts, including  
491 same-ROI contrasts (Figure 4 and Table 3), demonstrating that searchlight overlaps alone inflate false posi-  
492 tive rates by an order of magnitude. Therefore, the searchlight method itself introduces enough correlation  
493 between otherwise independent voxels to violate the assumption of independence required to use uncor-  
494 rected estimates of the difference-of-proportions. Taken together, our theoretical and experimental results  
495 demonstrate that the implicit assumption of independence in searchlight analyses by using uncorrected es-  
496 timates of standard error of difference-of-proportions substantially increases false positives, and must be  
497 avoided.

### 498 Positive control analyses

499 Since no evidence of a voxel-level place code could be found using a variety of approaches, we investigated  
500 the possibility that there was some unforeseen flaw in the image acquisition or analysis protocols. Using  
501 the same data, we determined whether two distinct phases in each trial, namely navigation vs. rest, could  
502 be classified (see *Methods*). Using our default method (i.e. LSVM, 3 mm smoothing, LMGs detrending) the  
503 two phases were clearly separable at a typical individual level (Figure 5a) and at the group level (Figure 5b).  
504 These analyses validate our image acquisition and data analysis protocols, and stand in contrast to our un-  
505 classifiable location results (Figure 2).

506 Figure 6 shows results for the positive control classification across 24 different analysis approaches. The  
507 median corrected group level p-value for the prevalence null hypothesis was less than 0.05 for all navigation  
508 vs. rest period classifications, across all ROIs, as well as smoothing and detrending methods, using LSVM  
509 (see Figure 6, left). The same was true of RSVM using polynomial detrending (see Figure 6, right). Note, how-  
510 ever, that some 95% confidence intervals for the p-values included 0.05, showing that the choice of data  
511 partition can significantly affect classification generalization success. Nonetheless, for LSVM even the 97.5<sup>th</sup>  
512 percentile p-value was below or close to 0.05 for both left and right hippocampus, using 2<sup>nd</sup> order polynomial  
513 detrending. Thus at the group level, it is clear that voxel patterns are informative for rest vs. navigation pe-  
514 riods of a task. Furthermore, we can exclude the possibility that only a small proportion of participants had  
515 classifiable voxel codes, which biased group results, since for all partitions where the null hypothesis was  
516 rejected, we can estimate the 95% confidence interval of the proportion of participants with a classifiable  
517 voxel code (Allefeld et al., 2016). For the smoothed right hippocampal data, LSVM resulted in null hypothesis  
518 rejection in 999/1000 random partitions. Of those, 0.62 to 1.00 of all participants are estimated to have a clas-  
519 sifiable voxel code for rest vs. navigation (95% CI, median of partition shuffles). Taken together, these results  
520 suggest that hippocampal voxel patterns can be used to predict rest vs. navigation periods at above-chance  
521 level, in the majority of participants. Importantly, there is a clear difference between the classification per-  
522 formance for location 1 vs. location 2, and rest vs. navigation, using the same participants, experimental  
523 design, fMRI acquisition parameters, and analysis method.

### 524 Evidence for the null hypothesis

525 After careful analysis, we did not find any evidence to reject the null hypothesis that there is no voxel place  
526 code. However, finding no evidence to reject the null hypothesis is different to finding evidence to directly

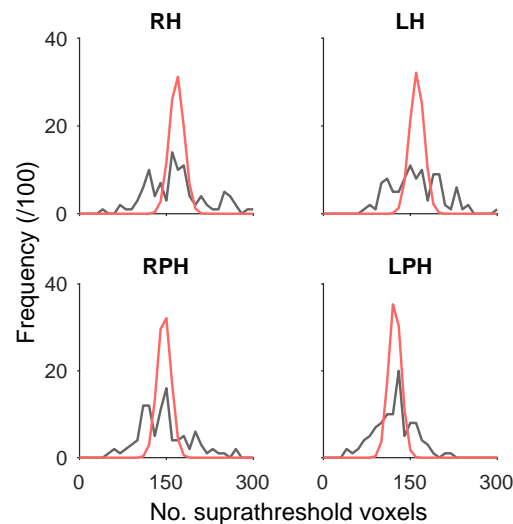

**Figure 4.** Frequency distribution of suprathreshold voxels in synthetic noise data sets corresponding to each individual ROI (black line,  $n = 100$ , see text for details). Using the same mean and assuming independent searchlight accuracies, a Gaussian approximation of the expected frequency of suprathreshold voxels (red line) shows substantial underestimation of the spread of suprathreshold voxel counts, causing an inflation of false positives, i.e. either higher or lower classification accuracies than expected by using the faulty null.

527 support it. Therefore, we considered whether the null hypothesis itself can be used to make testable predic-  
528 tions about the fMRI data. We used the default smoothed and globally detrended data from RH to test the  
529 predictions.

530 A straightforward prediction of the null hypothesis is that location labels do not matter and are effectively  
531 random when considering a population of participants. Thus for a sufficiently large sample size, the distri-  
532 bution of accuracies arising from true labels should be similar to the distribution due to shuffled labels. This  
533 was in fact the case for location classification (Figure 7a, red vs. black lines), where even distribution peaks  
534 arising from the discrete nature of scores were well matched. This directly supports the null hypothesis  
535 since true location labels were equivalent to shuffled labels, and were therefore uninformative. In contrast,  
536 if there is a genuine signal, then the two distributions should be distinct since the pooled distribution using  
537 true labels should no longer be equivalent to shuffled labels. This was in fact the case for task classification  
538 (Figure 7b, red vs. black lines), where the pooled distribution for true labels showed a higher mean and larger  
539 variance than for shuffled labels. These differences demonstrate that the true labels were not equivalent to  
540 shuffled labels, and therefore task information was present at the voxel level.

541 Next we asked whether it is possible to derive an approximate form of the pooled distribution for loca-  
542 tion classification using true labels (Figure 7a, red line), using only the null hypothesis and experimental  
543 parameters. If so, this would show the null hypothesis is a sufficient model to account for the accuracy  
544 results, adding further evidence to support the null hypothesis for location classification. To do this we  
545 developed a simple stochastic binomial model of accuracy based on the null hypothesis (see *Stochastic bi-*  
546 *nomial model for shuffled labels*). Our model was developed assuming statistical independence between  
547 data points which implies no label information. Hence our model should match data if there is no label infor-  
548 mation. Our stochastic model provided a good match for location classification distribution with either true  
549 or shuffled labels (Figure 7a), suggesting that the null hypothesis provides a good quantitative account of  
550 location classification data. The stochastic model also predicts that the variance should be inversely related  
551 to the number of data points used for classification per participant. For task classification, there were twice  
552 as many volumes used for classification (two tasks per navigation sequence), and the pooled distribution  
553 for task classification using shuffled labels had a correspondingly smaller variance (Figure 7b).

554 To more directly contrast the evidence for the null versus alternative hypothesis, we computed Bayes  
555 factors for each participant's accuracy results, using likelihoods estimated using models developed from  
556 the hypotheses. Therefore, in addition to the null model above, we needed a model of accuracy scores of  
557 individuals with true labels for the alternative hypothesis (that there is genuine information). Following simi-  
558 lar arguments as above, we developed a simple stochastic binomial model of accuracy based on fixed labels

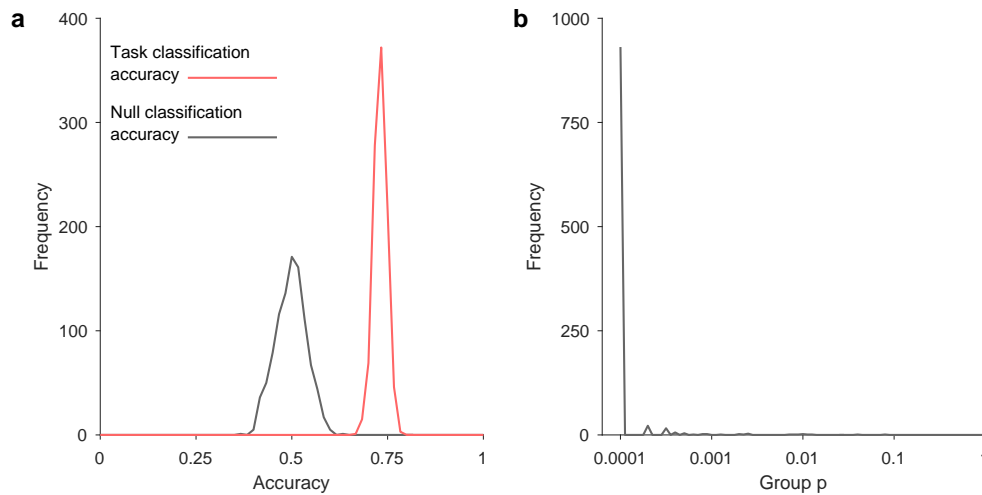

**Figure 5.** Results from right hippocampus for the control classification. **a.** A typical individual participant's distribution of classification accuracies (10-fold stratified cross-validation results) for task type (active vs. passive), over 1,000 random label-shuffles (black) and 1,000 random partitions (red) of true labels. **b.** Population inference results for control classification following Allefeld et al. (2016) (18 participants, one p-value computed for each of the 1,000 random partitions).

559 and random partitions (see Stochastic binomial model for true labels, Figure 7c & Figure 7d). The model  
 560 depended on the point accuracy score of classification as input, and predicted the corresponding accuracy  
 561 density function. In this way, any prior distribution of accuracies can be used as the alternative hypothesis.  
 562 To ensure that we did not inadvertently choose an alternative hypothesis which somehow biased outcomes,  
 563 we tested three different prior distributions of accuracies reflecting varying prior beliefs about true accuracies  
 564 (see Bayes Factor analysis).

565 There was a consistent pattern showing either no evidence (neutral) or evidence supporting (moderate,  
 566 strong to extreme) of the null hypothesis for location classification (Table 4, location). In contrast, there  
 567 was a consistent, but very different pattern showing either no evidence (neutral) or evidence supporting  
 568 (moderate, strong to extreme) the alternative hypothesis for task classification (Table 4, task). Notably, the  
 569 same pattern of results persisted across all three prior alternative hypotheses tested.

570 Taken together, the convergence of distributional, model and Bayes factor results directly and consistently  
 571 support the null hypothesis for location classification, and support the alternative hypothesis for task  
 572 classification. These results complement the nonparametric population inference analyses to argue against  
 573 any evidence for a voxel place code.

**Table 4.** Median Bayes factor (from 1,000 random partitions), out of a total of 18 participants, assumes shuffled labels variance for  $H_0$ . Abbreviations:  $SH_0$  = Strong to extreme evidence for  $H_0$  ( $BF < 1/10$ ),  $MH_0$  = Moderate evidence for  $H_0$  ( $1/10 \leq BF < 1/3$ ), N = Neutral ( $1/3 \leq BF \leq 3$ ),  $MH_1$  = Moderate evidence for  $H_1$  ( $3 < BF \leq 10$ ),  $SH_1$  = Strong to extreme evidence for  $H_1$  ( $10 < BF$ ). BF category thresholds are based on Dienes (2014); Jarosz and Wiley (2014); Jeffreys (2000); Ly et al. (2016); Raftery (1995).

| Classification | Prior p distribution for $H_1$ | $SH_0$ | $MH_0$ | N  | $MH_1$ | $SH_1$ |
|----------------|--------------------------------|--------|--------|----|--------|--------|
| Location       | Uniform                        | 8      | 7      | 3  | 0      | 0      |
|                | Linear                         | 5      | 4      | 9  | 0      | 0      |
|                | Quadratic                      | 5      | 3      | 10 | 0      | 0      |
| Task           | Uniform                        | 0      | 1      | 6  | 2      | 9      |
|                | Linear                         | 0      | 0      | 6  | 2      | 10     |
|                | Quadratic                      | 0      | 0      | 3  | 5      | 10     |



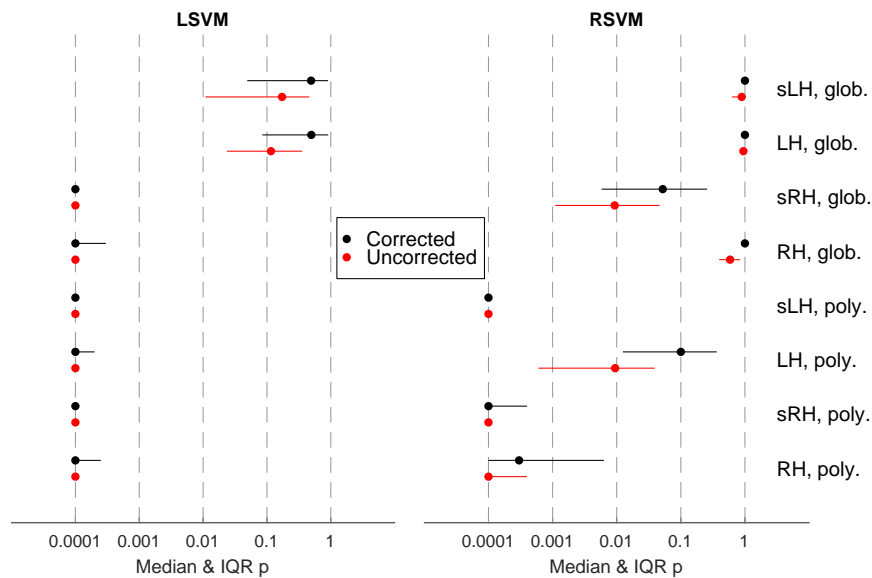

**Figure 6.** Overview of group significance results for different analysis approaches for the control (i.e. task type) classification following *Allefeld et al. (2016)*, showing median as well as interquartile range. Abbreviations: glob. = Linear Model of the Global Signal detrending, H = hippocampus, L = left, R = right, LSVM = linear support vector machine, poly. = polynomial detrending (2<sup>nd</sup> order), RSVM = support vector machine with radial basis function (Gaussian) kernel, s = smoothed (Gaussian kernel, radius = 3 mm).

## 574 Discussion

575 The goal of the present study was to reinvestigate whether human hippocampal place codes are detectable  
576 using fMRI. We employed a virtual environment that eliminated visual and path related confounds during  
577 the signal-decoding period to ensure that any positive finding would be indicative of a pure place code rather  
578 than a view code or a conjunctive view-trajectory code. We also employed a variety of signal processing and  
579 classification approaches, as well as a positive control analysis to evaluate carefully the possibility of the  
580 nonexistence of a purely spatial multivoxel place code.

581 Our experiment showed that, while participants were fully oriented during the navigation task, there was  
582 no statistical evidence for a place code, i.e. we could not reliably distinguish the two target locations using  
583 multivoxel-pattern classification algorithms. Additionally, we found robust and consistent evidence to directly  
584 support the null hypothesis for location classification data, using Bayes factor analysis and a model of  
585 SVM classification results derived from the hull hypothesis. These findings are in line with conclusions drawn  
586 from electrophysiological rodent data, which suggest that given the sparseness and distributed nature of  
587 place codes in the hippocampus, it would be implausible for them to be detectable using fMRI (*O'Keefe*  
588 *et al., 1998*; *Redish and Ekstrom, 2012*). Our findings are at odds with four prior imaging studies that  
589 reportedly have detected multivoxel place codes in the hippocampus (*Hassabis et al., 2009*; *Kim et al., 2017*;  
590 *Rodriguez, 2010*; *Sulpizio et al., 2014*). Since we employed a range of different image preprocessing and  
591 analysis approaches, it seems unlikely that our particular choice of analysis strategy could account for the  
592 discrepant results. Moreover, our control analysis showed that we were able to detect task-related changes  
593 in hippocampal activity, discounting the possibility that differences in image acquisition protocol or potentially  
594 image quality could be the reason prohibiting a positive finding.

595 In light of our results, it is important to carefully identify plausible reasons for the positive fMRI findings of  
596 published studies (*Hassabis et al., 2009*; *Kim et al., 2017*; *Rodriguez, 2010*; *Sulpizio et al., 2014*). We identified  
597 a number of shortcomings in the experimental tasks and analysis strategies of the four fMRI studies that  
598 could explain why each study seemingly detected a multivoxel place code in the hippocampus.

## 599 Statistical issues

600 Invalid assumptions of statistical independence

601 *Hassabis et al. (2009)* made the implicit assumption of statistical independence between searchlight ac-  
602 curacies that is violated in fMRI data (see *Evaluation of analysis used in Hassabis et al. (2009)* for details).

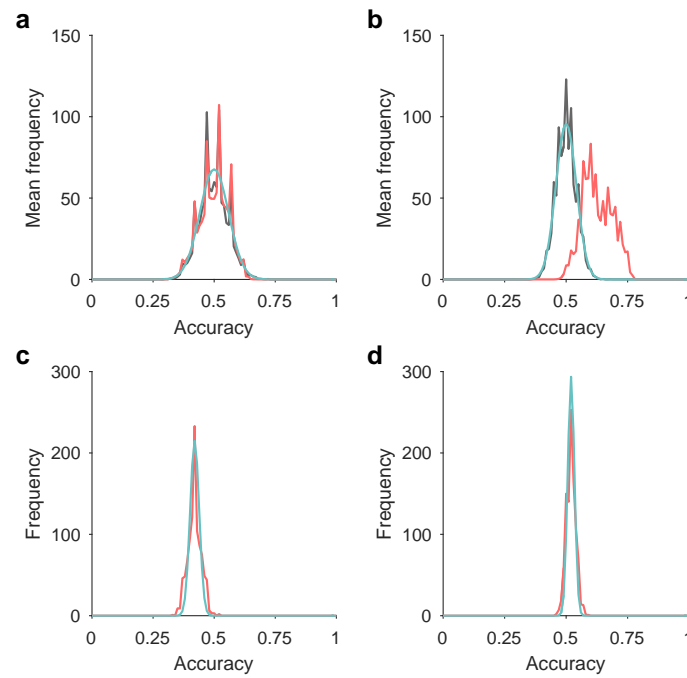

**Figure 7.** Comparison of noise model and LSVM accuracy distributions from RH. **a.** The frequency distribution of accuracy results is shown for location classification, averaged across all 18 participants, with shuffled (black) and true (red) location labels. A Gaussian approximation is shown (cyan) using a mean of 0.5 and variance estimated by a stochastic model assuming no label information. **b.** As per **a** but for task classification. **c.** The frequency distribution of accuracy results is shown for location classification from a typical participant from **a** using true location labels (red). A Gaussian approximation is shown (cyan) using the mean of the individual's sample, and variance estimated by a stochastic model assuming partition noise only. **d.** As per **c** but for task classification.

603 More detailed inspection of the suprathreshold counts from the original experiment (Hassabis, 2009, sec.  
604 3.6.3 Sub-region dissociation) reveals that numerous suprathreshold proportions were in fact less than 5%  
605 despite using a 95<sup>th</sup> percentile threshold. For example, for their pairwise location comparison for subject  
606 2, the hippocampal suprathreshold count was 118/4032 searchlights (= 2.9%), the parahippocampal gyrus  
607 suprathreshold count was 70/3822 searchlights (= 1.8%), and the reported p-value was 0.002 for this con-  
608 trast despite so few searchlights reaching the shuffled data's threshold. Importantly, all p-values reported  
609 were replicable using the faulty method outlined earlier. Across 16 contrasts reported, 22/32 suprathreshold  
610 proportions were less than 5%. Therefore, these original results showed no evidence that location classifica-  
611 tion was possible in either ROI, and in hindsight should have raised alarms about the subsequent statistical  
612 methodology.

#### 613 Paired t-test on accuracies

614 Rodriguez (2010) and Sulpizio et al. (2014) relied on a paired t-test for group analysis of decoding perfor-  
615 mance. As discussed in the *Methods*, when applied to classification accuracies, such a test will with high  
616 probability yield 'significant' results even though only a small minority of participants in the population  
617 shows above-chance classification (Allefeld et al., 2016).

#### 618 Classifier confounds

619 Rodriguez (2010) included both the encoding and test phases of each trial in the dataset as independent  
620 trials. The classifier may have identified the general relatedness of the two phases being part of the same  
621 trial, rather than the spatial location per se. Many factors unrelated to location in the virtual arena could  
622 have contributed to two consecutive phases of a trial being similar, including simply being close in time.

623 Similarly, Sulpizio et al. (2014) included several identical images in the training and test sets (i.e. three  
624 instances per unique view were used for training the classifier and one for testing it in their leave-one-out  
625 cross validation procedure). This alone could lead to successful overall classification.

626 Finally, Kim et al. (2017) provided few details regarding the path structures used in the navigation task.  
627 It is only mentioned that pseudorandom trajectories were used and that 76% of all trials involved the inner

628 eight (out of 64) locations used for the fMRI analysis. It is not clear from the description in which order the  
629 locations were visited. The nature of the trajectories could, however, have a significant effect on similarity of  
630 the fMRI signals associated with each location, either due to different levels of autocorrelation, or related to  
631 different levels of locational awareness that might be confounded with certain path characteristics. In short,  
632 without careful quantification of the path structure it is difficult to exclude the possibility that it might have  
633 contributed to the statistical discriminability of the fMRI signal associated with different locations.

### 634 **Experimental design issues**

635 A true place code should be demonstrably selective for position in a mnemonic representation of space  
636 rather than particular visual cues. Unlike rodent place cells, however, earlier monkey work showed that pri-  
637 mate hippocampal cells signal locations or objects being looked at, independently of current self-location  
638 (e.g. Robertson et al., 1998; Rolls, 1999; Rolls et al., 1997). These results show that mammalian hippocam-  
639 pal spatial codes are not necessarily place-specific, and in some cases may be intrinsically interwoven with  
640 visual inputs. Furthermore, electrophysiological recordings from the human hippocampus suggest that the  
641 majority of active neurons are not spatially-selective, but may instead respond to various types of visual stim-  
642 ulti (Kreiman et al., 2000). Unfortunately, all four studies that claim to provide evidence for a voxel place code  
643 (Hassabis et al., 2009; Kim et al., 2017; Rodriguez, 2010; Sulpizio et al., 2014) failed to remove significant visual  
644 confounds, which implies that even a legitimate voxel code in these experiments could be sensory-driven  
645 rather than be a true place code.

### 646 **Visually distinct landmarks**

647 Reliable and unique visual landmarks pose a particular problem. In the most obvious scenario, such a cue  
648 might be visible in a period used for classification, a possibility in the study by Rodriguez (2010) (depending  
649 on the field of view). Even in the case that the cue is not visible at the classification point, however, visual  
650 traces or visual memory could account for positive classification. Participants in the Rodriguez (2010) ex-  
651 periment took direct paths to the goals (time limited, active navigation task), therefore the egocentric view  
652 direction of the landmark during navigation varied systematically with the goal location. Similarly, the vir-  
653 tual environments used by Hassabis et al. (2009) consisted of visually distinct landmarks on or adjacent to all  
654 walls, visible en route to target locations. The virtual environment outlined by Kim et al. (2017) contained a  
655 salient local landmark (a green door, whose visibility depended on the direction of travel and visual obstruc-  
656 tions). The authors stated that the door was “occasionally” visible, but failed to demonstrate that neither  
657 those times nor visual appearance of the door were correlated with impending arrival location. In all three  
658 of these cases, above-chance decoding could be due to differences in visual information during navigation  
659 rather than pure spatial location.

### 660 **Visual panoramas**

661 Unique landmarks are a specific case of the more general problem of unique panoramas: any unique clas-  
662 sifiable code may be due to the particular combination of visual cues rather than the more abstract notion  
663 of place. Such a confound was present in the experiment by Sulpizio et al. (2014), which required that static  
664 visual scenes completely determine location and orientation. Similarly, Kim et al. (2017) compared parallel  
665 locations in their rectangular environment, which would undoubtedly provide different panoramas — in-  
666 dependent of the allocentric direction — due to different wall distance configurations. This problem could  
667 have been avoided by keeping the lattice edges rotationally symmetric but comparing only diagonally oppo-  
668 site rather than parallel corners, as these are visually equivalent (2-fold rotational symmetry; Cheung, 2014;  
669 Cheung et al., 2008; Stürzl et al., 2008)).

### 670 **Optic flow**

671 In the study by Kim et al. (2017), there was a connection bias between the locations in the 3D environment  
672 employed (i.e. not every location was connected to every location, and connections were not always sym-  
673 metric) that caused the optic flows to differ depending on which test location was immediately upcoming.  
674 Earlier animal studies have shown that the hippocampus is sensitive to visual aspects of linear and rotational  
675 motion (O’Mara et al., 1994), and that it receives information from the accessory optic system (Wylie et al.,  
676 1999), which is a visual pathway dedicated to the analysis of optic flow. Hence, a classifier may be able to  
677 detect differences in preceding global optic flow, which in turn correlated with test location.

## 678 Correcting visual confounds

679 In an attempt to alleviate concerns regarding the visual cues, Kim et al. (2017) used a simple visual texture  
680 model (Renninger and Malik, 2004) that provided a single visual similarity value for each trial (i.e. images  
681 captured at every half a second during the five second journey period for each location were averaged and  
682 entered into the texture model). The authors showed that even if these visual similarity measures were  
683 included in the analysis, location could still be inferred from the anterior hippocampal voxel patterns, and  
684 took this as a confirmation for the existence of a pure place code. It is, however, questionable whether the  
685 visual texture model was suited to account for the differences in visual scenes encountered during navigation.  
686 For example, having a long wall to the right and a short wall to the front defines a distinct location to having  
687 a long wall to the left and a short wall to the front. Yet visual textures and other low level visual features may  
688 be virtually identical. The only way to ensure that differences in visual information during navigation cannot  
689 affect voxel patterns is to eliminate them entirely from the task design.

## 690 Conclusions

691 All existing studies which assert to have found evidence for a hippocampal place code using functional mag-  
692 netic resonance imaging can be challenged based on either statistical or task-related concerns and provide  
693 no robust convincing evidence of a multivoxel place code in humans. Further evidence against the detectabil-  
694 ity of a hippocampal place code using functional magnetic resonance imaging comes from a published pilot  
695 study (n = 3) by Op de Beeck et al. (2013) which employed a virtual navigation paradigm with the aim of de-  
696 coding location information from fMRI activation patterns, but also found no statistical evidence for a place  
697 code in the hippocampus. They were, however, able to statistically infer spatial location from voxel patterns  
698 in the visual cortex, giving further weight to our concerns regarding visual confounds in the aforementioned  
699 studies. Moreover, a number of recent studies have shown that patients with hippocampal damage have  
700 difficulties in complex visual discrimination task, suggesting a role of the hippocampus in visual perception  
701 (Hartley et al., 2007; Lee et al., 2005a,b, 2006, 2007). In contrast, activity of bona fide place cells identified in  
702 rodents has been shown repeatedly to be view-independent and persists even without visual information  
703 (Quirk et al., 1990; Rochefort et al., 2011; Save et al., 1998, 2000). Hippocampal place cells of bats have also  
704 been shown to persist without visual input (Ulanovsky and Moss, 2007). Similarly, pure place cells identi-  
705 fied in the hippocampus of epilepsy patients were also view-independent (Ekstrom et al., 2003). In line with  
706 place cell properties common to phylogenetically diverse mammalian species, claiming the existence of a  
707 multivoxel place code necessitates exclusion of direct visual contributions to activity differences.

708 In summary, we have conducted a detailed assessment of the claim that place codes are detectable us-  
709 ing fMRI in human hippocampus. Our combined experimental and theoretical results provide rigorous and  
710 consistent evidence against this claim. Additionally, we identified several serious shortcomings in published  
711 imaging studies claiming evidence in favour of a hippocampal multivoxel place code. We also note that elec-  
712 trophysiological data suggest that hippocampal place codes are both sparse and anatomically distributed,  
713 so that imaging techniques such as fMRI should not, at least at present, be capable of detecting location-  
714 specific place cell activity. Taking all evidence in combination, claims of the existence of a purely spatial  
715 voxel code of location should therefore be treated with appropriate scepticism. We assert that any future  
716 imaging study claiming evidence in favour of a multivoxel place code should rigorously eliminate potential  
717 confounds due to visual features, path trajectories and semantic associations that could lead to decodable  
718 differences between spatial locations. In addition, it will be crucial to employ appropriate and robust statis-  
719 tical tools to avoid false positives that are a particular concern for high dimensional data.

## 720 References

- 721 Allefeld C, Gorgen K, Haynes JD. Valid population inference for information-based imaging: From the second-level t-test  
722 to prevalence inference. *Neuroimage* 2016 Nov;141:378–392.
- 723 Baumann O, Chan E, Mattingley JB. Dissociable neural circuits for encoding and retrieval of object locations during active  
724 navigation in humans. *Neuroimage* 2010 Feb;49(3):2816–2825.
- 725 Baumann O, Chan E, Mattingley JB. Distinct neural networks underlie encoding of categorical versus coordinate spatial  
726 relations during active navigation. *Neuroimage* 2012 Apr;60(3):1630–1637.
- 727 Baumann O, Mattingley JB. Dissociable representations of environmental size and complexity in the human hippocampus.  
728 *J Neurosci* 2013 Jun;33(25):10526–10533.

- 729 Op de Beeck HP, Vermaercke B, Woolley DG, Wenderoth N. Combinatorial brain decoding of people's whereabouts during  
730 visuospatial navigation. *Front Neurosci* 2013 May;7:78.
- 731 Brodersen KH, Daunizeau J, Mathys C, Chumbley JR, Buhmann JM, Stephan KE. Variational Bayesian mixed-effects infer-  
732 ence for classification studies. *Neuroimage* 2013 Aug;76:345–361.
- 733 Brown EN, Frank LM, Tang D, Quirk MC, Wilson MA. A statistical paradigm for neural spike train decoding applied to position  
734 prediction from ensemble firing patterns of rat hippocampal place cells. *J Neurosci* 1998 Sep;18(18):7411–7425.
- 735 Burgess N, Maguire EA, O'Keefe J. The human hippocampus and spatial and episodic memory. *Neuron* 2002 Aug;35(4):625–  
736 641.
- 737 Cheung A. Estimating location without external cues. *PLoS Comput Biol* 2014 Oct;10(10):e1003927.
- 738 Cheung A, Stürzl W, Zeil J, Cheng K. The information content of panoramic images II: view-based navigation in nonrectan-  
739 gular experimental arenas. *J Exp Psychol Anim Behav Process* 2008 Jan;34(1):15–30.
- 740 Daniel WW, Terrell JC. *Business Statistics: For Management and Economics*. 7th revised edition ed. Houghton Mifflin;  
741 1994.
- 742 Dienes Z. Using Bayes to get the most out of non-significant results. *Front Psychol* 2014 Jul;5:781.
- 743 Ekstrom AD, Kahana MJ, Caplan JB, Fields TA, Isham EA, Newman EL, et al. Cellular networks underlying human spatial  
744 navigation. *Nature* 2003 Sep;425(6954):184–188.
- 745 Hartley T, Bird CM, Chan D, Cipolotti L, Husain M, Vargha-Khadem F, et al. The hippocampus is required for short-term  
746 topographical memory in humans. *Hippocampus* 2007;17(1):34–48.
- 747 Hassabis D. *The Neural Processes Underpinning Episodic Memory*. PhD thesis, University College London; 2009.
- 748 Hassabis D, Chu C, Rees G, Weiskopf N, Molyneux PD, Maguire EA. Decoding neuronal ensembles in the human hippocam-  
749 pus. *Curr Biol* 2009 Apr;19(7):546–554.
- 750 Haynes JD. A Primer on Pattern-Based Approaches to fMRI: Principles, Pitfalls, and Perspectives. *Neuron* 2015  
751 Jul;87(2):257–270.
- 752 Huettel SA, Song AW, McCarthy G. *Functional Magnetic Resonance Imaging*. 3rd ed. 2014 edition ed. Sinauer; 2014.
- 753 Jarosz AF, Wiley J. What Are the Odds? A Practical Guide to Computing and Reporting Bayes Factors. *The Journal of*  
754 *Problem Solving* 2014;7(1):2.
- 755 Jeffreys H. *Theory of Probability*. Third edition ed. Oxford University Press; 2000.
- 756 Kamitani Y, Sawahata Y. Spatial smoothing hurts localization but not information: pitfalls for brain mappers. *Neuroimage*  
757 2010 Feb;49(3):1949–1952.
- 758 Kim M, Jeffery KJ, Maguire EA. Multivoxel Pattern Analysis Reveals 3D Place Information in the Human Hippocampus. *J*  
759 *Neurosci* 2017 Apr;37(16):4270–4279.
- 760 Kreiman G, Koch C, Fried I. Category-specific visual responses of single neurons in the human medial temporal lobe. *Nat*  
761 *Neurosci* 2000 Sep;3(9):946–953.
- 762 Kriegeskorte N, Goebel R, Bandettini P. Information-based functional brain mapping. *Proc Natl Acad Sci U S A* 2006  
763 Mar;103(10):3863–3868.
- 764 Lee ACH, Buckley MJ, Gaffan D, Emery T, Hodges JR, Graham KS. Differentiating the roles of the hippocampus and perirhi-  
765 nal cortex in processes beyond long-term declarative memory: a double dissociation in dementia. *J Neurosci* 2006  
766 May;26(19):5198–5203.
- 767 Lee ACH, Buckley MJ, Pegman SJ, Spiers H, Scahill VL, Gaffan D, et al. Specialization in the medial temporal lobe for  
768 processing of objects and scenes. *Hippocampus* 2005;15(6):782–797.
- 769 Lee ACH, Bussey TJ, Murray EA, Saksida LM, Epstein RA, Kapur N, et al. Perceptual deficits in amnesia: challenging the  
770 medial temporal lobe 'mnemonic' view. *Neuropsychologia* 2005;43(1):1–11.
- 771 Lee ACH, Levi N, Davies RR, Hodges JR, Graham KS. Differing profiles of face and scene discrimination deficits in semantic  
772 dementia and Alzheimer's disease. *Neuropsychologia* 2007 May;45(9):2135–2146.
- 773 Ly A, Verhagen J, Wagenmakers EJ. Harold Jeffreys's default Bayes factor hypothesis tests: Explanation, extension, and  
774 application in psychology. *J Math Psychol* 2016 Jun;72(Supplement C):19–32.

- 775 Macey PM, Macey KE, Kumar R, Harper RM. A method for removal of global effects from fMRI time series. *Neuroimage* 2004  
776 May;22(1):360–366.
- 777 Maldjian JA, Laurienti PJ, Kraft RA, Burdette JH. An automated method for neuroanatomic and cytoarchitectonic atlas-  
778 based interrogation of fMRI data sets. *Neuroimage* 2003 Jul;19(3):1233–1239.
- 779 Nichols TE, Holmes AP. Nonparametric permutation tests for functional neuroimaging: a primer with examples. *Hum*  
780 *Brain Mapp* 2001 Oct;15(1):1–25.
- 781 O’Keefe J, Burgess N, Donnett JG, Jeffery KJ, Maguire EA. Place cells, navigational accuracy, and the human hippocampus.  
782 *Philos Trans R Soc Lond B Biol Sci* 1998 Aug;353(1373):1333–1340.
- 783 O’Keefe J, Dostrovsky J. The hippocampus as a spatial map. Preliminary evidence from unit activity in the freely-moving  
784 rat. *Brain Res* 1971 Nov;34(1):171–175.
- 785 O’Mara SM, Rolls ET, Berthoz A, Kesner RP. Neurons responding to whole-body motion in the primate hippocampus. *J*  
786 *Neurosci* 1994 Nov;14(11 Pt 1):6511–6523.
- 787 Poldrack RA, Mumford JA, Nichols TE. *Handbook of Functional MRI Data Analysis*. Cambridge University Press; 2011.
- 788 Quirk GJ, Muller RU, Kubie JL. The firing of hippocampal place cells in the dark depends on the rat’s recent experience. *J*  
789 *Neurosci* 1990 Jun;10(6):2008–2017.
- 790 Raftery AE. Bayesian model selection in social research. *Sociol Methodol* 1995;25:111–163.
- 791 Redish AD, Ekstrom A. Hippocampus and related areas: what the place cell literature tells us about cognitive maps in  
792 rats and humans. In: Waller D, Nadel L, editors. *Handbook of Spatial Cognition*, 1 edition ed. American Psychological  
793 Association (APA); 2012.p. 14–34.
- 794 Renninger LW, Malik J. When is scene identification just texture recognition? *Vision Res* 2004;44(19):2301–2311.
- 795 Robertson RG, Rolls ET, Georges-François P. Spatial view cells in the primate hippocampus: effects of removal of view  
796 details. *J Neurophysiol* 1998 Mar;79(3):1145–1156.
- 797 Rochefort C, Arabo A, André M, Poucet B, Save E, Rondi-Reig L. Cerebellum shapes hippocampal spatial code. *Science*  
798 2011 Oct;334(6054):385–389.
- 799 Rodriguez PF. Neural decoding of goal locations in spatial navigation in humans with fMRI. *Hum Brain Mapp* 2010  
800 Mar;31(3):391–397.
- 801 Rolls ET. Spatial view cells and the representation of place in the primate hippocampus. *Hippocampus* 1999;9(4):467–480.
- 802 Rolls ET, Robertson RG, Georges-François P. Spatial view cells in the primate hippocampus. *Eur J Neurosci* 1997  
803 Aug;9(8):1789–1794.
- 804 Save E, Cressant A, Thinus-Blanc C, Poucet B. Spatial firing of hippocampal place cells in blind rats. *J Neurosci* 1998  
805 Mar;18(5):1818–1826.
- 806 Save E, Nerad L, Poucet B. Contribution of multiple sensory information to place field stability in hippocampal place cells.  
807 *Hippocampus* 2000;10(1):64–76.
- 808 Song S, Zhan Z, Long Z, Zhang J, Yao L. Comparative study of SVM methods combined with voxel selection for object  
809 category classification on fMRI data. *PLoS One* 2011 Feb;6(2):e17191.
- 810 Stelzer J, Chen Y, Turner R. Statistical inference and multiple testing correction in classification-based multi-voxel pattern  
811 analysis (MVPA): random permutations and cluster size control. *Neuroimage* 2013 Jan;65:69–82.
- 812 Stürzl W, Cheung A, Cheng K, Zeil J. The information content of panoramic images I: The rotational errors and the similarity  
813 of views in rectangular experimental arenas. *J Exp Psychol Anim Behav Process* 2008 Jan;34(1):1–14.
- 814 Sulpizio V, Committeri G, Galati G. Distributed cognitive maps reflecting real distances between places and views in the  
815 human brain. *Front Hum Neurosci* 2014 Sep;8:716.
- 816 Tzourio-Mazoyer N, Landeau B, Papathanassiou D, Crivello F, Etard O, Delcroix N, et al. Automated anatomical labeling of  
817 activations in SPM using a macroscopic anatomical parcellation of the MNI MRI single-subject brain. *Neuroimage* 2002  
818 Jan;15(1):273–289.
- 819 Ulanovsky N, Moss CF. Hippocampal cellular and network activity in freely moving echolocating bats. *Nat Neurosci* 2007  
820 Feb;10(2):224–233.
- 821 Wylie DR, Glover RG, Aitchison JD. Optic flow input to the hippocampal formation from the accessory optic system. *J*  
822 *Neurosci* 1999 Jul;19(13):5514–5527.
